# Supplementary material for: Highly fluorescent conjugated microporous polymers for concurrent adsorption and detection of uranium
Source: Royal Society of Chemistry journal article supplement (doi:10.1039/c8ta11764k), 2019-01-01
Supplement: c8ta11764k1.pdf [file c8ta11764k1.pdf]

Supporting Information

## Highly fluorescent conjugated microporous polymers for concurrent adsorption and detection of uranium

Meiyun Xu, Tao Wang, Peng Gao, Li Zhao, Lei Zhou, Daoben Hua\*

<sup>a</sup> State Key Laboratory of Radiation Medicine and Protection, School of Radiological and Interdisciplinary Sciences (RAD-X), Soochow University, Suzhou 215123, China.

<sup>b</sup> Collaborative Innovation Center of Radiological Medicine of Jiangsu Higher Education Institutions, Suzhou 215123, China.

\*Corresponding author. Email: dbhua\_lab@suda.edu.cn (D. Hua); Tel & Fax: +86-512-65883261.

### Table of contents

|                                     |     |
|-------------------------------------|-----|
| Materials and characterization..... | S3  |
| Synthesis of FCN.....               | S3  |
| Synthesis of CMPTF.....             | S3  |
| Theory and Calculation.....         | S4  |
| Table S1.....                       | S7  |
| Table S2.....                       | S7  |
| Table S3.....                       | S8  |
| Table S4.....                       | S8  |
| Table S5.....                       | S9  |
| Table S6.....                       | S9  |
| Table S7.....                       | S9  |
| Table S8.....                       | S10 |
| Figure S1.....                      | S11 |

|                 |     |
|-----------------|-----|
| Figure S2.....  | S11 |
| Figure S3.....  | S12 |
| Figure S4.....  | S12 |
| Figure S5.....  | S13 |
| Figure S6.....  | S13 |
| Figure S7.....  | S14 |
| Figure S8.....  | S14 |
| Figure S9.....  | S15 |
| Figure S10..... | S15 |
| Figure S11..... | S16 |
| Figure S12..... | S16 |
| Figure S13..... | S17 |
| Figure S14..... | S17 |
| Figure S15..... | S18 |
| Figure S16..... | S18 |
| Figure S17..... | S19 |
| Figure S18..... | S19 |
| Figure S19..... | S20 |
| Figure S20..... | S20 |
| References..... | S21 |

## 1. Materials and characterization

1,3,5-Triethynylbenzene (J&K Chemical Technology Co., Ltd.), 2,7-dibromo-9H-fluorene (BePharm Ltd), tetrakis (triphenylphosphine)-palladium(0) [Pd(PPh<sub>3</sub>)<sub>4</sub>], CuI and acrylonitrile (Sinopharm Chemical Reagent Co., Ltd.), hydroxylamine hydrochloride (CP, Shanghai Macklin Biochemical Co., Ltd), and uranyl nitrate UO<sub>2</sub>(NO<sub>3</sub>)<sub>2</sub>·6H<sub>2</sub>O (Fluka, AR) were used as received. DMF was dried over CaH<sub>2</sub> and distilled prior to use. Triethylamine was dried over 4Å molecular sieve. All other solvents used in the experiments were of analytical grade. Ultrapure water used in the all experiments was obtained from Milli-Q water purification system (Milli-pore Corporation, USA).

Transmission electron microscopy (TEM) was performed on a Tecnai G2 spirit BioTwin field emission scanning electron microscope. X-ray photoelectron spectroscopy (XPS) was carried out by an ESCALAB 250Xi spectrometer. Fourier transform infrared (FTIR) spectra were recorded on a Varian-1000 spectrometer. Solid-state <sup>13</sup>C CP/MAS NMR measurements were carried out on a Bruker Avance III model 400 MHz NMR spectrometer at a MAS rate of 5 kHz. Surface areas and pore size distributions were measured by N<sub>2</sub> sorption and desorption at 77.3 K using the ASAP 2020 volumetric sorption analyzer. BET surface areas were calculated over the relative pressure range 0.05-0.15 P/P<sub>0</sub>. Samples were degassed at 100 °C for 10 h under high vacuum before analysis. The concentration of uranium (VI) was determined by thermo high-resolution inductively coupled plasma mass spectrometry (ICP-MS, Element II).

## 2. Synthesis of 3,3'-(2,7-dibromo-9H-fluorene-9,9-diyl)dipropanenitrile (FCN).

A suspension of 2,7-dibromo-9H-fluorene (2.00 g, 6.16 mmol) and benzyltriethyl- ammonium chloride (8.75 mg, 0.04 mmol) in dioxane (15 g) was degassed and backfilled with nitrogen gas three times. 15% NaOH (0.3 g) and acrylonitrile (0.75g, 14.20 mmol) were added dropwise *via* a syringe successively, and the content was stirred under N<sub>2</sub> for 30 min at room temperature. 80 mL heptane was added into the resulting mixture. The solid was filtered, washed three times with heptane and methanol, and then dried at 50 °C *in vacuo* to give FCN as a white powder in 90% yield. <sup>1</sup>H NMR (CDCl<sub>3</sub>, 400 MHz), δ 7.59 (4H, m), 7.51 (2H, m), 2.43 (4H, t, *J*=5.2 Hz), 1.57 (4H, q, *J*= 5.2 Hz).

## 3. Synthesis of CMPH.

CMPH was synthesized according to reported literature.<sup>[1-2]</sup> Nitrogen was bubbled to the DMF solution (8 mL) of 1,3,5-Triethynylbenzene (100 mg, 0.666 mmol) and F (215.7 mg, 0.666 mmol)

for 30 min. Pd(PPh<sub>3</sub>)<sub>4</sub> (23.1 mg, 0.02 mmol) and CuI (7.6 mg, 0.04 mmol) were added into the solution followed by injection of 8 mL Et<sub>3</sub>N. The reaction mixture was stirred at 90°C under N<sub>2</sub> for 48 hours. After cooling down, the mixture was filtered, and then washed with hot DMF for 2 times. The residue was dispersed in 100 mL THF with sonication, and then stirred with refluxed THF under N<sub>2</sub> for 2 hours. After cooling down, the mixture was filtered, and the proceed was repeated for 3 times. The coarse product was further washed with hot methanol for 48 hours by Soxhlet extraction, and then dried under vacuum at 50 °C to give CMPH (200 mg) in 96% yield as a yellow powder.

#### 4. Theory and Calculation.

##### 4.1 BET calculation

BET equations can be described as follows:

$$\frac{1}{V(p_0/p - 1)} = \frac{C - 1}{V_m C} \times \frac{p}{p_0} + \frac{1}{V_m C} \quad (1)$$

$$S = \frac{V_m}{22400} N_A \sigma_m \times 10^{-18} \quad (2)$$

where  $V$  is sorption capacity (cc/g),  $p/p_0$  is the relative pressure, constant  $V_m$  (cc/g) stands for the adsorption capacity of solid surface covered with molecular layer cc/g,  $C$  is a constant relating to adsorption heat,  $S$  is the total specific surface area of adsorbent,  $\sigma_m$  is the cross section area of adsorbate molecule (nm<sup>2</sup>), and  $N_A$  is Avogadro constant. Constant  $V_m$  and  $C$  can be determined from the plot of  $1/(V(p_0/p - 1))$  against  $p_0/p$  (Table S6 and Figure S7).

##### 4.2 Sorption kinetics<sup>[3-4]</sup>

Pseudo-first-order equation is described as following Equation (3):

$$\log(q_e - q_t) = \log q_e - \left(\frac{k_1}{2.303}\right) \times t \quad (3)$$

where  $q_e$  and  $q_t$  (mg g<sup>-1</sup>) are the sorption capacity of U(VI) at equilibrium time and contact time  $t$  [min], respectively, and  $k_1$  [min<sup>-1</sup>] represents the pseudo first order kinetic constant.  $q_e$  and  $k_1$  can be calculated from the slope and intercept of the plot of  $\log(q_e - q_t)$  versus  $t$ , respectively (Figure S10A).

Pseudo-second-order model is expressed as the following Equation (4):

$$\frac{t}{q_t} = \frac{1}{k_2 \times q_e^2} + \frac{t}{q_e} \quad (4)$$

where  $k_2$  [g/mg/min] represents the rate constant of the pseudo-second order model, and can be

determined from the plot of  $t/q_t$  against  $t$  (Figure S10B).

#### 4.3 Sorption isotherms<sup>[5]</sup>

Langmuir model can be described as Equation (5):

$$\frac{C_e}{q_e} = \frac{1}{q_{\max}b} + \frac{C_e}{q_{\max}} \quad (5)$$

where  $b$  [L mg<sup>-1</sup>] is the Langmuir constant related to the affinity of binding sites, and  $q_{\max}$  [mg g<sup>-1</sup>] is the maximum sorption capacity. They can be calculated from the linear plot of  $C_e/q_e$  against  $C_e$  (Figure S12A).

The Freundlich model<sup>1</sup> is applied for multilayer sorption, which can be described as Equation (6):

$$\log q_e = \log K_F + \frac{1}{n} \log C_e \quad (6)$$

where  $K_F$  [mg/g (L/mg)<sup>1/n</sup>] and  $n$  are the Freundlich constants related to sorption capacity and sorption intensity, respectively, which can be calculated from the linear plot of  $\log q_e$  versus  $\log C_e$  (Figure S12B).

#### 4.4 Selectivity coefficients for uranium (VI) ( $S_U$ )<sup>[6]</sup>

The selectivity coefficients for uranium (VI) ( $S_U$ ) can be calculated according to Equation (7):

$$S_U = \frac{q_{e,U}}{q_{e,total}} \times 100\% \quad (7)$$

where  $q_{e,U}$  and  $q_{e,total}$  (mmol/g) are the sorption capacity for uranium (VI) and the competing metal ions, respectively.

#### 4.5 Detection limit (DT) in deionized water.<sup>[7]</sup>

Based on the fluorescence measurement shown in Figure 6, the linear correlation in low uranyl concentration range (Figure S18) can be fitted as

$$y = 105.79x + 1.06 \quad (8)$$

where  $y$  is the relative decrease of luminescence intensity  $((I_0 - I)/I_0)\%$  monitored at 483 nm, and  $x$  is the uranyl concentration.

The standard deviation ( $\sigma$ ) is defined as  $100 \times (I_{SE}/I_0)$ , where  $I_{SE}$  is the standard error of the emission measurement, as determined by the baseline measurement of blank samples (monitored at 483 nm),  $I_0$  is the luminescence intensity of CMPAO-4 in deionized water (also monitored at 483 nm).

The detection limit is calculated according to Equation (9) and (10):

$$DT = 3\sigma / \text{slope} \quad (9)$$

$$\sigma = 100 \times (I_{SE} / I_0) \quad (10)$$

If defining three times of the standard deviation as the detectable signal, the detection limit can be projected as  $3\sigma/\text{slope} = 0.4 \mu\text{g/L}$  ( $1.7 \times 10^{-9} \text{ M}$ ).

**Table S1.** The content of Pd and Cu in the materials from XPS progressive etching.

| Sorbent | Pd (% atomic)* | Cu (% atomic)* |
|---------|----------------|----------------|
| CMPH    | 0.29           | 0.47           |
| CMPCN   | 0.34           | 0.58           |
| CMPAO-1 | 0.24           | 0.63           |
| CMPAO-2 | 0.22           | 0.48           |
| CMPAO-3 | 0.25           | 0.60           |
| CMPAO-4 | 0.20           | 0.51           |

\*: the average value of the content of the depth of 0 nm, 5 nm, 10 nm and 15 nm.

**Table S2.** The composition of metal ions in simulated liquid low-level waste.

| Metal ion        | Concentration (ppm) |
|------------------|---------------------|
| Na <sup>+</sup>  | 92,300              |
| K <sup>+</sup>   | 19,000              |
| Ca <sup>2+</sup> | 1,800               |
| Mg <sup>2+</sup> | 300                 |
| Sr <sup>2+</sup> | 20                  |
| Al <sup>3+</sup> | 15                  |
| Ba <sup>2+</sup> | 3                   |
| Cr <sup>3+</sup> | 3                   |
| Pb <sup>2+</sup> | 3                   |

**Table S3.** The contents of different functional groups calculated from XPS N1s spectra.

| Materials | Peak     | Binding energy (eV) | FWHM* (eV) | Area    |
|-----------|----------|---------------------|------------|---------|
| CMPAO-1   | C=N, C≡N | 399.38              | 1.40       | 6116.92 |
|           | N-OH     | 399.98              | 1.41       | 4714.44 |
| CMPAO-2   | C=N, C≡N | 399.42              | 1.37       | 7624.24 |
|           | N-OH     | 400.02              | 1.43       | 6852.85 |
| CMPAO-3   | C=N, C≡N | 399.42              | 1.34       | 8263.25 |
|           | N-OH     | 400.02              | 1.48       | 7923.79 |
| CMPAO-4   | C=N, C≡N | 399.35              | 1.65       | 2532.81 |
|           | N-OH     | 400.00              | 1.53       | 2466.18 |

\*: Full width at half maximum.

**Table S4.** The contents of different functional groups calculated from XPS O1s spectra.

| Materials | Peak             | Binding energy (eV) | FWHM* (eV) | Area     |
|-----------|------------------|---------------------|------------|----------|
| CMPAO-1   | COO <sup>-</sup> | 531.32              | 1.63       | 3606.27  |
|           | N-OH             | 532.65              | 1.88       | 12478.76 |
| CMPAO-2   | COO <sup>-</sup> | 531.46              | 1.84       | 5175.92  |
|           | N-OH             | 532.71              | 1.93       | 16828.33 |
| CMPAO-3   | COO <sup>-</sup> | 531.50              | 1.83       | 6057.20  |
|           | N-OH             | 532.75              | 1.84       | 15545.02 |
| CMPAO-4   | COO <sup>-</sup> | 531.32              | 1.87       | 5254.79  |
|           | N-OH             | 532.60              | 1.97       | 10541.46 |

\*: Full width at half maximum.

**Table S5.** Elemental analysis of CMPCN and CMPAO-1~4.



| Sorbent | N (%) | C (%) | H (%) |
|---------|-------|-------|-------|
| CMPCN   | 5.511 | 79.26 | 4.150 |
| CMPAO-1 | 8.453 | 70.10 | 5.361 |
| CMPAO-2 | 8.849 | 68.27 | 5.644 |
| CMPAO-3 | 9.527 | 67.73 | 5.764 |
| CMPAO-4 | 8.204 | 64.42 | 5.69  |

**Table S6.** Multi-Point BET parameters for CMPH, CMPCN and CMPAO-1~4.

| Sorbent | $V_m$ (cc/g) | C        | R <sup>2</sup> |
|---------|--------------|----------|----------------|
| CMPTF   | 0.137        | 1046.003 | 1.000          |
| CMPCN   | 20.455       | -57.481  | 0.999          |
| CMPAO-1 | 0.021        | 6.223    | 0.999          |
| CMPAO-2 | 0.010        | 8.447    | 0.996          |
| CMPAO-3 | 0.011        | 16.731   | 1.000          |
| CMPAO-4 | 0.013        | 51.551   | 0.999          |

**Table S7.** Kinetic parameters for the sorption of U(VI) by CMPAO-1~4. (Experimental conditions:  $C_{\text{CMPAO}} = 0.25$  mg/mL,  $C_{\text{U(VI)}} = 5 \times 10^{-5}$  mol/L, pH 6.0 $\pm$ 0.1, 298.15 K)

| Sorbent | $q_{e,\text{exp}}$<br>(mg/g) | Pseudo-first-order            |                              |                | Pseudo-second-order |                              |                |
|---------|------------------------------|-------------------------------|------------------------------|----------------|---------------------|------------------------------|----------------|
|         |                              | $k_1$<br>(min <sup>-1</sup> ) | $q_{e,\text{cal}}$<br>(mg/g) | R <sup>2</sup> | $k_2$<br>(g/min/mg) | $q_{e,\text{cal}}$<br>(mg/g) | R <sup>2</sup> |
| CMPAO-1 | 31.513                       | 0.0026                        | 24.099                       | 0.962          | 2.639E-4            | 33.921                       | 0.995          |
| CMPAO-2 | 22.774                       | 0.0032                        | 15.983                       | 0.948          | 8.156E-5            | 23.041                       | 0.993          |
| CMPAO-3 | 23.642                       | 0.0016                        | 20.292                       | 0.858          | 6.500E-4            | 24.882                       | 0.997          |
| CMPAO-4 | 45.789                       | 0.0039                        | 27.899                       | 0.900          | 3.987E-4            | 46.926                       | 0.997          |

**Table S8.** Langmuir and Freundlich parameters for the sorption of U(VI) by CMPAO-1~4.  
(Experimental conditions:  $C_{\text{CMPAO}} = 0.25 \text{ mg/mL}$ ,  $C_{\text{U(VI)}} = 5 \times 10^{-5} \text{ mol/L}$ , pH  $6.0 \pm 0.1$ , 298.15 K)

| Sorbent | Langmuir                   |            |       | Freundlich  |       |       |
|---------|----------------------------|------------|-------|-------------|-------|-------|
|         | $q_{\text{max}}$<br>(mg/g) | $b$ (L/mg) | $R^2$ | $K_F$ (L/g) | $n$   | $R^2$ |
| CMPAO-1 | 156.5                      | 0.0316     | 0.998 | 13.493      | 2.089 | 0.941 |
| CMPAO-2 | 147.7                      | 0.0167     | 0.996 | 6.162       | 1.693 | 0.961 |
| CMPAO-3 | 149.0                      | 0.0167     | 0.998 | 4.876       | 1.538 | 0.964 |
| CMPAO-4 | 251.9                      | 0.1099     | 0.997 | 47.543      | 2.662 | 0.962 |

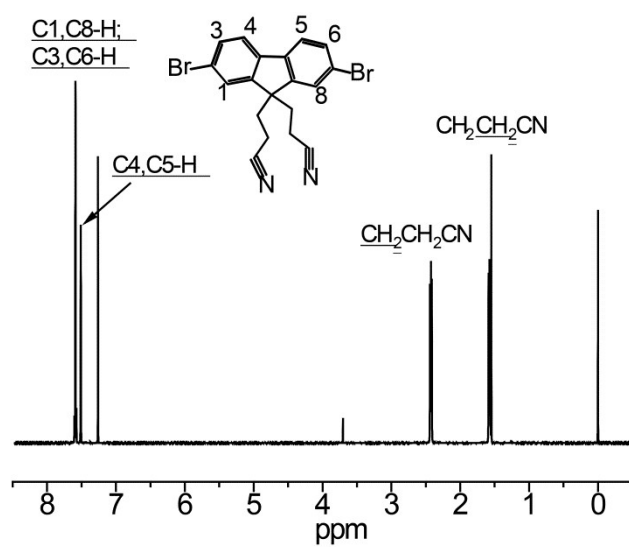

**Figure S1.**  $^1\text{H}$  NMR spectrum of FCN

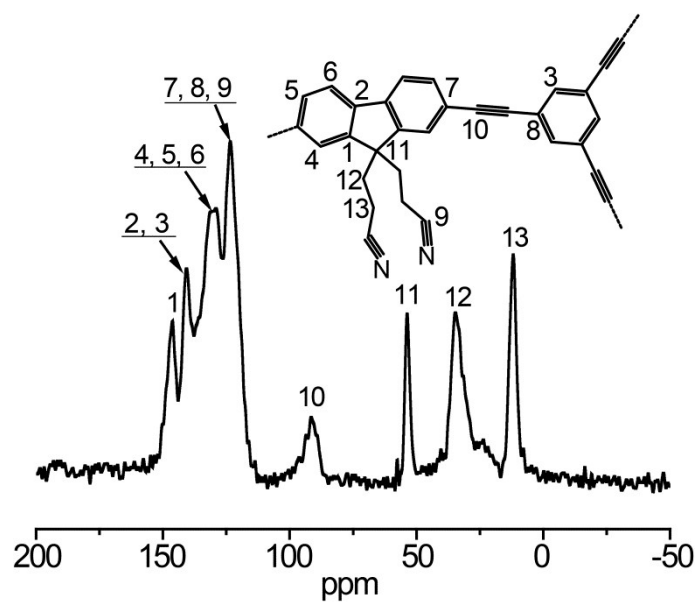

**Figure S2.** Solid-state  $^{13}\text{C}$  NMR spectrum of CMPCN.

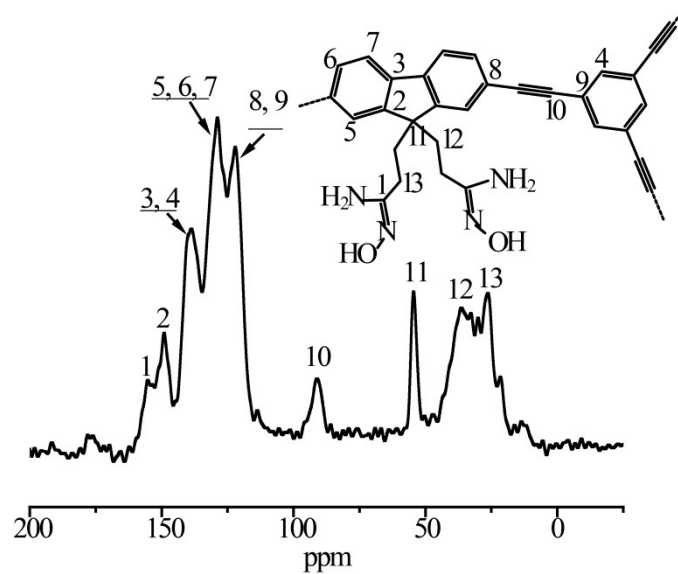

**Figure S3.** Solid-state  $^{13}\text{C}$  NMR spectrum of CMPAO-2.

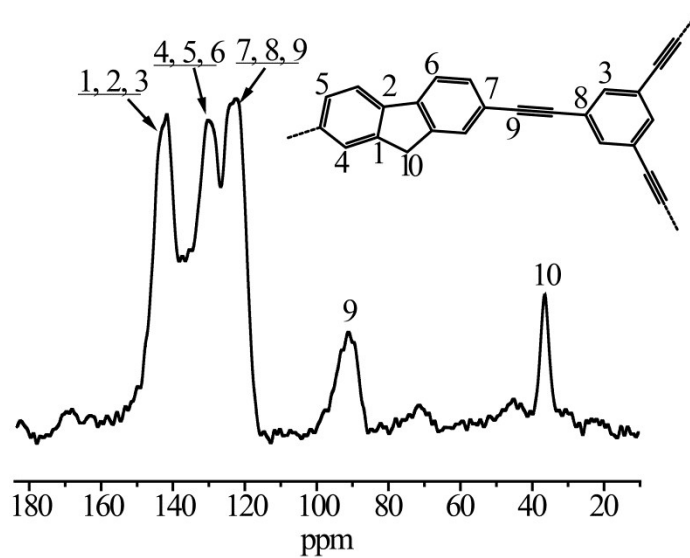

**Figure S4.** Solid-state  $^{13}\text{C}$  NMR spectrum of CMPH

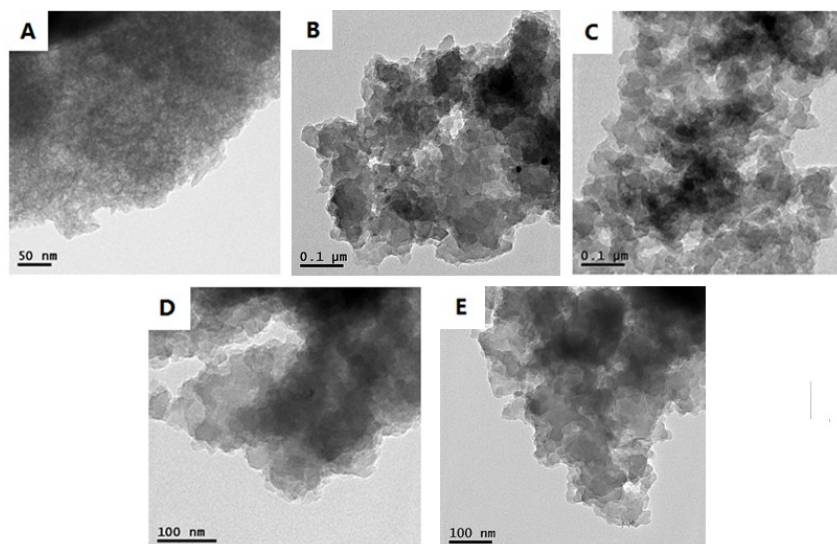

**Figure S5.** TEM images of (A) CMPCN, (B) CMPAO-1, (C) CMPAO-2, (D) CMPAO-3, (E) CMPAO-4

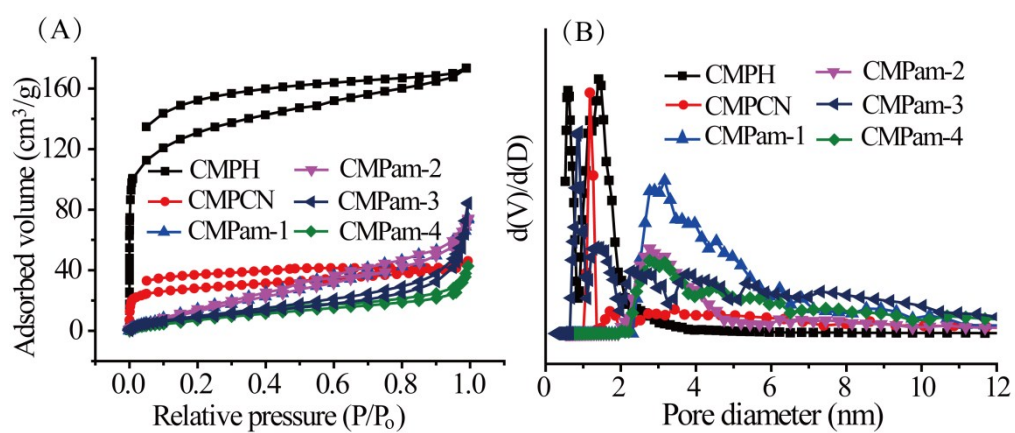

**Figure S6.** (A) Nitrogen sorption/desorption isotherms and (B) pore size distribution for CMPH, CMPCN and CMPAO-1~4.

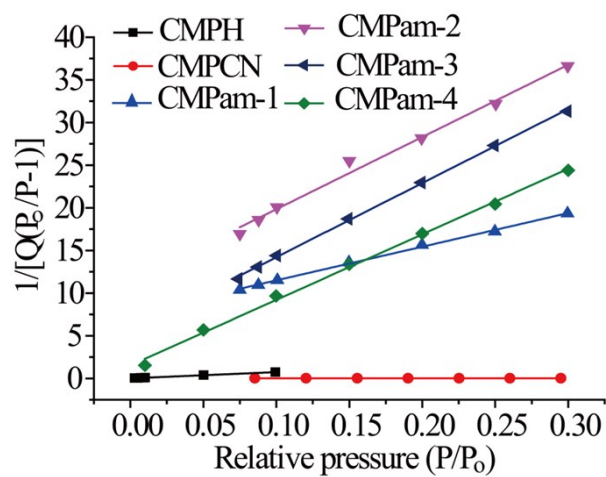

**Figure S7.** BET Surface Area Plot of CMPh, CMPCN and CMPAO.

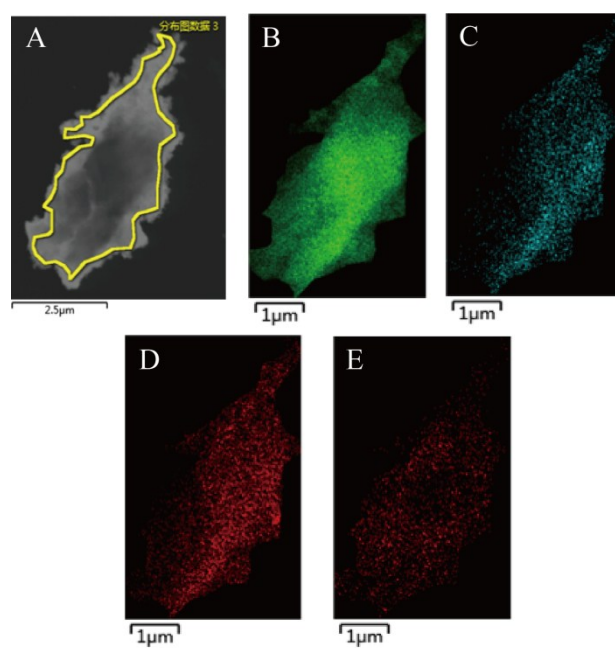

**Figure S8.** (A) HAADF-STEM image, (B) carbon, (C) nitrogen, (D) oxygen, and (E) uranium elemental mapping of the CMPAO-U(VI).

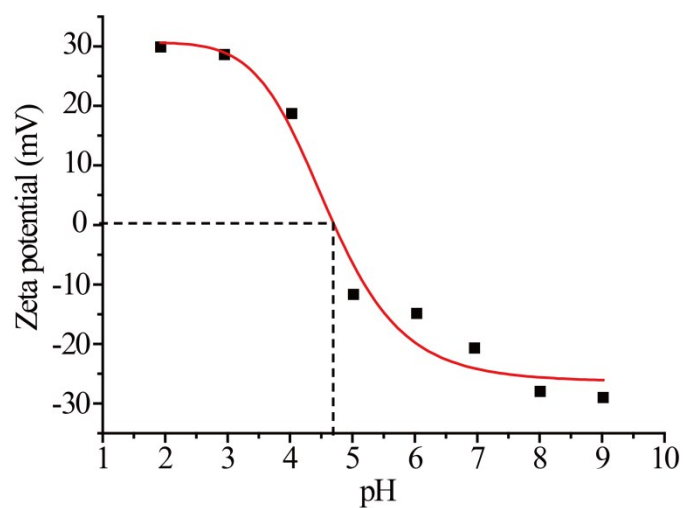

**Figure S9.** Zeta potential of CMPAO-4.

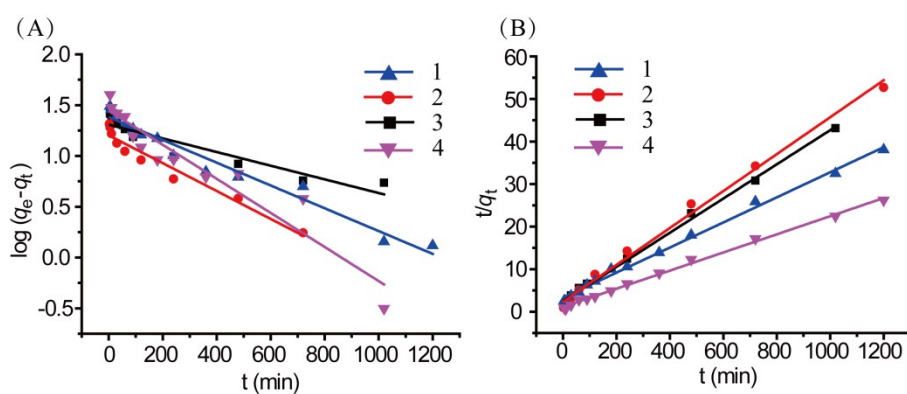

**Figure S10.** Kinetic models for the sorption of U(VI) onto the CMPAO-1~4. (A) Pseudo-first order model and (B) pseudo-second order.

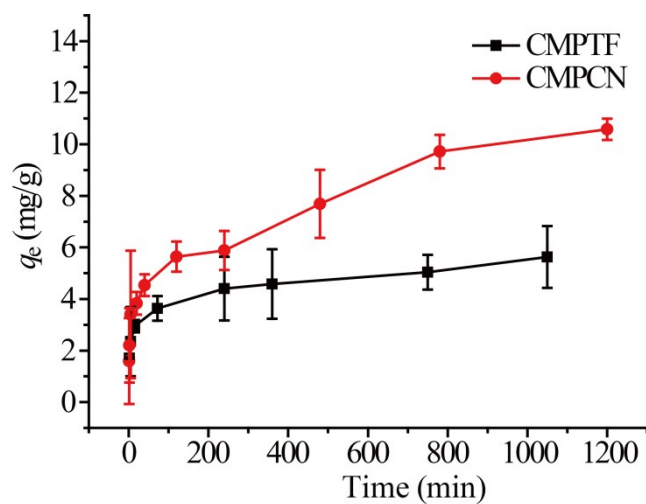

**Figure S11.** (A) Sorption kinetics of CMPTF and CMPCN for U(VI) (Experimental conditions:  $C_{\text{sorbent}} = 0.25 \text{ mg mL}^{-1}$ ,  $C_{\text{U(VI)}} = 5 \times 10^{-5} \text{ mol L}^{-1}$ , pH  $6.0 \pm 0.1$ , and 298.15 K).

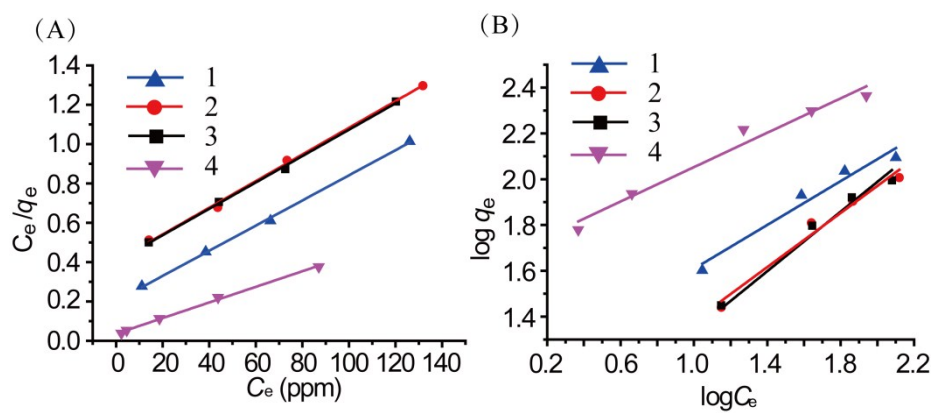

**Figure S12.** (A) Langmuir isotherm model and (B) Freundlich isotherm model for the sorption of U(VI) onto the CMPAO-1~4.



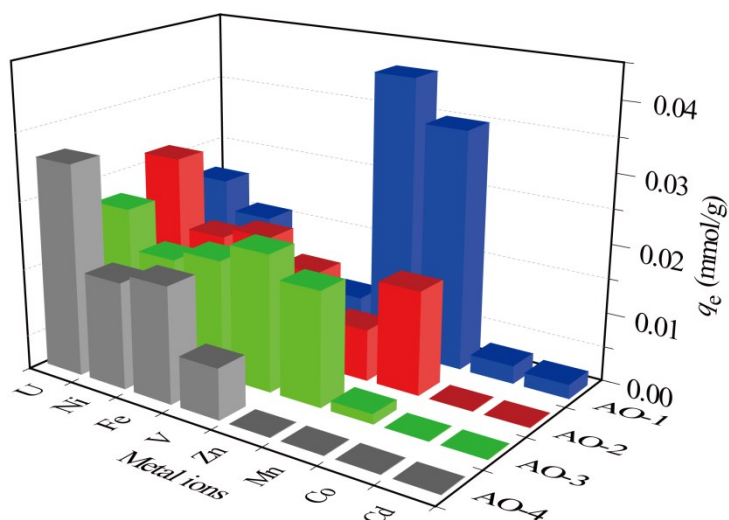

**Figure S13.** The sorption capacity for U (VI) and competing metal ions on CMPAO-1~4 in seawater with additional ions. (Experimental conditions:  $C_{\text{sorbent}} = 0.25 \text{ mg mL}^{-1}$ ,  $C_{\text{metal ions}} = 2 \times 10^{-5} \text{ M}$ , and 298.15 K).

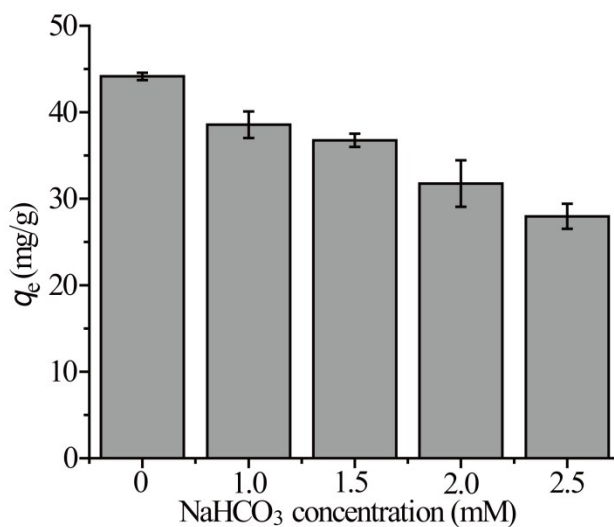

**Figure S14.** The effect of salt concentration on sorption and reusability of CMPAO. (A) The effect of salt concentration on sorption; (B) reusability (Experimental conditions:  $C_{\text{sorbent}} = 0.25 \text{ mg mL}^{-1}$ ,  $C_{\text{U}} = 5 \times 10^{-5} \text{ M}$ , and 298.15 K).

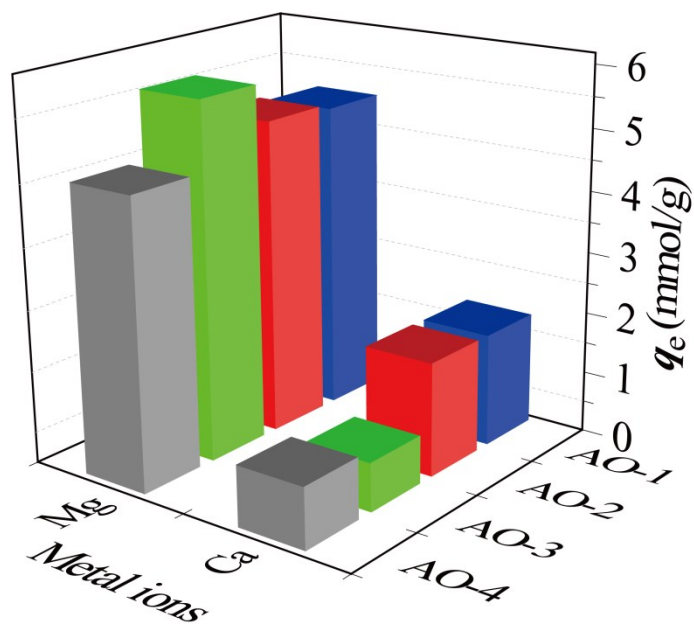

**Figure S15.** The sorption capacity for  $\text{Ca}^{2+}$  and  $\text{Mg}^{2+}$  on CMPAO-1~4 in seawater with additional ions. (Experimental conditions:  $C_{\text{sorbent}} = 0.25 \text{ mg mL}^{-1}$ ,  $C_{\text{metal ions}} = 2 \times 10^{-5} \text{ M}$ , 298.15 K).

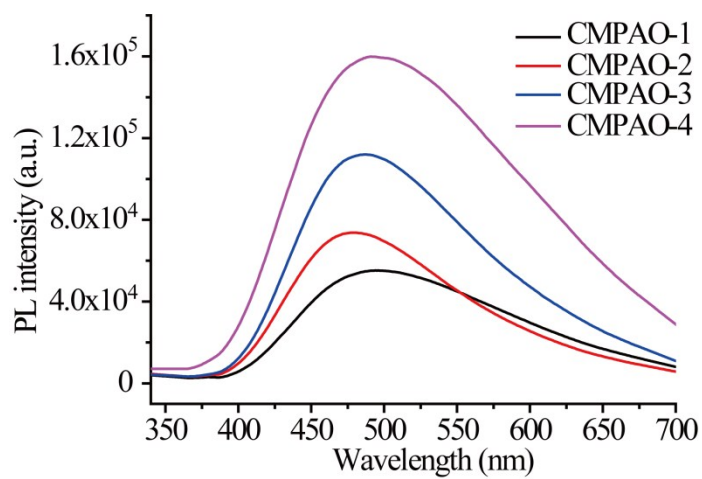

**Figure S16.** Emission spectra of CMPAO-4 in uranyl solution ( $\lambda_{\text{ex}} = 320 \text{ nm}$ ,  $C_{\text{sorbent}} = 0.20 \text{ mg mL}^{-1}$ ,  $T = 298.15 \text{ K}$ ).

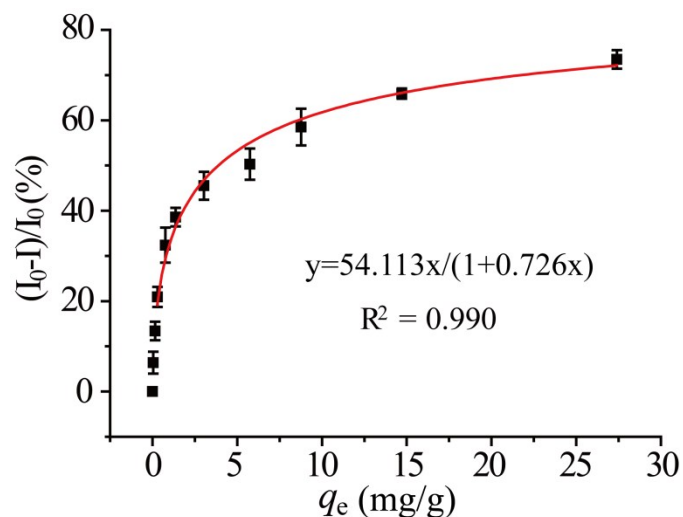

**Figure S17.** Correlation between the quenching factor and sorption capacity of CMPAO-4 ( $\lambda_{\text{ex}} = 320$  nm, data at 483 nm was selected for analysis.  $C_{\text{sorbent}} = 0.20 \text{ mg mL}^{-1}$ ,  $T = 298.15 \text{ K}$ ).

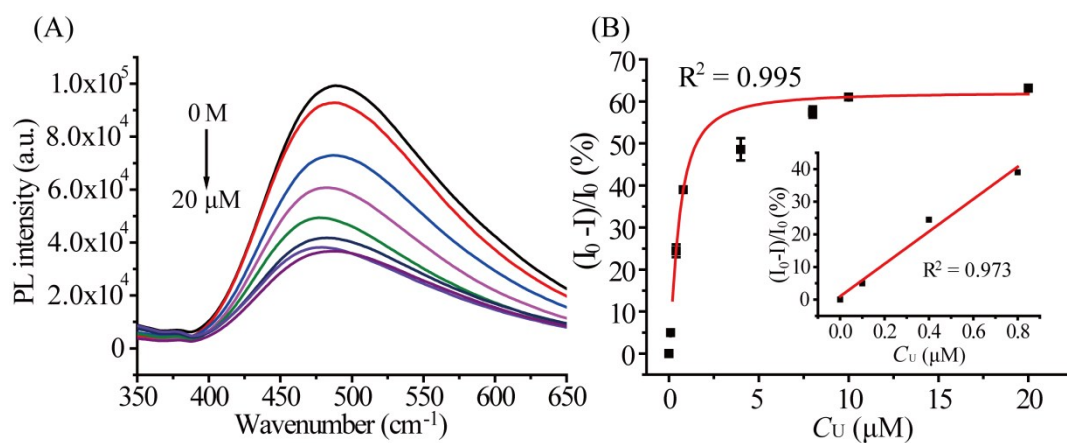

**Figure S18.** Fluorescence-based uranyl detection studies. (A) Emission spectra of CMPAO-4 in simulated liquid low-level waste with varying uranyl concentration (0~20  $\mu\text{M}$ ). (B) Simulated correlation between quenching ratio  $[(I_0 - I)/I_0]\%$  and  $\text{UO}_2^{2+}$  concentration using the Langmuir model. The inset is the relative decrease of luminescence intensity (measured at 483 nm) of CMPAO-4 as a function of the uranyl concentration in low concentration (0-0.8  $\mu\text{M}$ ) ( $\lambda_{\text{ex}} = 320 \text{ nm}$ , data at 483 nm was selected for analysis.  $C_{\text{sorbent}} = 0.20 \text{ mg mL}^{-1}$ ,  $T = 298.15 \text{ K}$ ).

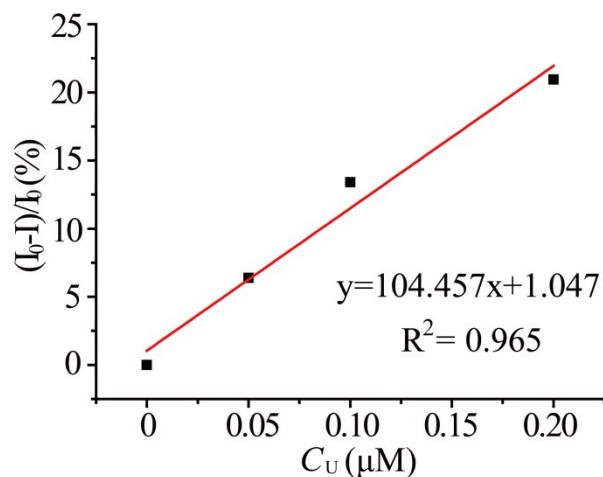

**Figure S19.** The relative decrease of luminescence intensity (measured at 483 nm) of CMPAO-4 as a function of the uranyl concentration in low concentration (0-0.2  $\mu\text{M}$ ) are fitted in linear relationship ( $\lambda_{\text{ex}} = 320$  nm, data at 483 nm was selected for analysis.  $C_{\text{sorbent}} = 0.20$  mg  $\text{mL}^{-1}$ ,  $T = 298.15$  K).

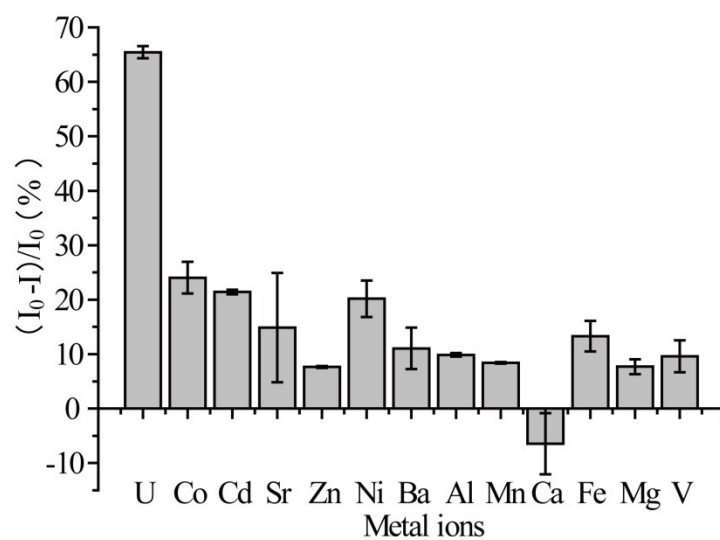

**Figure S20.** Luminescence quenching ratio of CMPAO-1~4 in different metal salt solutions ( $\lambda_{\text{ex}} = 320$  nm, data at 483 nm was selected for analysis.  $C_{\text{sorbent}} = 0.20$  mg  $\text{mL}^{-1}$ ,  $T = 298.15$  K).

## References

1. Han X, Xu M, Yang S, Qian J, Hua D. Acetylcysteine-functionalized microporous conjugated polymers for potential separation of uranium from radioactive effluents. *Journal of Materials Chemistry A* **5**, 5123-5128 (2017).
2. Kiskan B, Weber J. Versatile Postmodification of Conjugated Microporous Polymers Using Thiol-yne Chemistry. *ACS Macro Letter* **1**, 37–40 (2012).
3. Ho YS, McKay G. Pseudo-second order model for sorption processes. *Process Biochemistry* **34**, 451-465 (1999).
4. Ho YS, McKay G. The kinetics of sorption of divalent metal ions onto sphagnum moss peat. *Water Research* **34**, 735-742 (2000).
5. Sadeghi S, Aboobakri E. Magnetic nanoparticles with an imprinted polymer coating for the selective extraction of uranyl ions. *Microchimica Acta* **178**, 89-97 (2012).
6. Zhang S, *et al.* “Stereoscopic” 2D super-microporous phosphazene-based covalent organic framework: Design, synthesis and selective sorption towards uranium at high acidic condition. *Journal of Hazardous Materials* **314**, 95-104 (2016).
7. Liu W, *et al.* Highly Sensitive and Selective Uranium Detection in Natural Water Systems Using a Luminescent Mesoporous Metal-Organic Framework Equipped with Abundant Lewis Basic Sites: A Combined Batch, X-ray Absorption Spectroscopy, and First Principles Simulation Investigation. *Environ Sci Technol* **51**, 3911-3921 (2017).
